# Supplementary material
Source: PubMed Central journal article supplement (PMC1794689)
Supplement: 7400823-s1.pdf [file 7400823-s1.pdf]

## SUPPLEMENTARY INFORMATION

### Supplementary Methods

**Antibodies**– AU1 monoclonal antibody, Covance. EPS15 rabbit polyclonal antibody, Santa Cruz. EEA1 monoclonal antibody, BD. S5a monoclonal antibody and anti-ubiquitin conjugate monoclonal antibody (FK2), Cedarlane. GFP monoclonal antibody, Roche.  $\alpha$ -tubulin rabbit polyclonal antibody, Sigma. MYC tagged proteins were detected with the anti-MYC clone 9E10. Rabbit PLIC-1 antibodies as described in Bedford et al., 2001. Donkey anti-mouse and anti-rabbit antibodies conjugated to fluorescein, rhodamine or peroxidase, Jackson Labs.

**Plasmids**– MYC-PLIC-1 representing isoform 2 was created by PCR from rat brain cDNA and cloned into pRK5-MYC. MYC-PLIC-1 <sup>$\Delta$ UBL</sup> (codons 110-561) and MYC-PLIC-1 <sup>$\Delta$ UBA</sup> (codons 2-514) were created by PCR using MYC-PLIC-1 as a template and cloned into pRK5-MYC. GFP-PLIC-1<sup>UBL</sup> and GST-PLIC-1<sup>UBL</sup> were created by PCR of the UBL domain (1-109) using pRK5-MYC-PLIC-1 as a template and cloned into pEGFP-C1 (BD Biosciences) and pGEX-4T-3 (Amersham Biosciences) respectively. pEGFP-EPS15 was kindly provided by Dr. P. McPherson. pGEX-EPS15<sup>UIM1+2</sup> and pDEST15-S5a used for the preparation of GST-EPS15<sup>UIM1+2</sup> and GST-S5a fusion proteins respectively, as well as HIS-EPS15, HIS-EPS15 <sup>$\square$ UIM</sup> were kindly provided by Dr. E.A. Fon. pCMVTag3a-HSJ1a and pCMVTag3-HSJ1a <sup>$\square$ UIM</sup> were kindly provided by Dr. M. Cheetham. pMYC-ataxin-3 and pAUI-Q78 were kindly provided by Dr. G. Rouleau.

**Immunoprecipitation of Ubiquitinated Proteins**– HEK293 cells were plated on 10 cm dishes and transfected with MYC-tagged PLIC-1 constructs. 24 hours post-transfection, cells were lysed in buffer containing 25 mM Hepes pH 7.4, 125 mM KOAc, 2.5 mM MgOAc, 5 mM EGTA and 0.5% NP-40 and 10mM NEM at 4°C for 1h. Nuclei and insoluble material were removed by centrifugation at 13,000 rpm. Antigen-antibody complexes were immunoprecipitated with anti-MYC clone 9E10 and Protein-G-Sepharose beads (Amersham Biosciences) at 4°C for 2h. Beads were then washed in lysis buffer three times before analysis by Western blot with anti-Myc and anti-ubiquitin (FK2) antibodies.

**Semi-quantitative PCR**– cDNA was synthesized from total RNA (1 $\mu$ g) by reverse transcription using 70 U of Superscript Reverse Transcriptase (Invitrogen) and oligo(dt)12–18 primer (Invitrogen) in a 10 $\mu$ l reaction mixture containing Superscript buffer (Invitrogen), 0.5 mM dNTP mix, 10 mM DTT, and 40 U RNase inhibitor. Total RNA and oligo(dt)12–18 primers

were incubated at 65°C for 5 min prior to the reverse transcription reaction. After incubation for 1 h at 42 °C, the reaction was stopped by incubation with RNaseH (1U) digestion 30 min at 37 °C. For PCR amplification, 0.5  $\mu$ l of cDNA was added to a 20 $\mu$ l reaction containing 25  $\mu$ M each primer, 0.2 mM of dNTP mix, 1 U Taq polymerase (Invitrogen) in 1X mix in Thermopol buffer (Invitrogen). PCR was performed in a DNA Thermal Cycler (PTC-200, MJ research). The following primers were used: PLIC-1 sense 5'-CCC AGG GGG ATA TAA TGC TT-3; PLIC-1 antisense 5'-TAC CAG TAG TGC CAC CCA CA-3', CHOP sense 5'-GGC AGC TGA GTC ATT GCC 3'; CHOP antisense, 5'- GCA GAT TCA CCA TTC GGT CA -3', GAPDH sense, 5'-GAA GGT GAA GGT CGG AGT C-3'; and GAPDH antisense 5'-GAA GAT GGT GAT GGG ATT TC-3'. The PCR products (9.5  $\mu$ l) were resolved by electrophoresis in a 1% agarose gel in TAE buffer. The gels were stained with ethidium bromide and then photographed under ultraviolet light. cDNA for PLIC-1 was amplified for 28 (94 °C 45 sec, 60 °C 45 sec, and 72 °C 45 sec) cycles, for CHOP 25 cycles and for GAPDH 28 cycles.

***Live Imaging and Nocodazole Treatment***– HEK293 cells were transfected with GFP-EPS15 and MYC-PLIC-1 and imaged. Images of GFP fluorescence were taken once every 90 seconds for 30 minutes. Nocodazole (1 $\mu$ M) was added to the media 40 min prior and during imaging. Images were acquired on a Zeiss Axiovert 135 microscope.

## LEGENDS TO FIGURES

**Supplementary Figure 1. Cellular localization of transfected PLIC-1 and EPS15.** HEK293 cells were transfected with (A) MYC-PLIC-1 or (B) HIS-EPS15 and stained for immunofluorescence with anti-MYC or anti-EPS15 antibodies. Scale bar is 10 $\mu$ M.

**Supplementary Figure 2. Cytoplasmic structures are not expanded endosomes.** HEK293 cells were transfected with MYC-PLIC-1 and HIS-EPS15 and stained for immunofluorescence with anti-EPS15 and anti-EEA1 antibodies. Scale bar is 10 $\mu$ m.

**Supplementary Figure 3. Cytoplasmic structures merge in a microtubule dependent manner.** HEK293 cells were transfected with GFP-EPS15 and MYC-PLIC-1 and images acquired in (A) the absence or (B) the presence of 1 $\mu$ M nocodazole. Images of GFP fluorescence were acquired every 90 seconds, four images covering 9 minutes are shown. Note in (A) perinuclear-localized fusion events at 6 min and 9 min time points. Arrows point to a smaller structure fusing with a larger structure. In (B) note a larger number of smaller aggregates as well as fewer fusion events. *Scale bar is 10  $\mu$ m.* (C) The change in number of cytoplasmic

aggregates per cell over a 30 minute time period. For untreated cells, change in the number of was  $-2.57 \pm 0.72$ ,  $n=7$  and for nocodazole treated cells, the change in the number of was  $-0.25 \pm 0.88$ ,  $n=8$ .

**Supplementary Figure 4. PLIC-1<sup>UBL</sup> binds ubiquitinated proteins.** HEK293 cells were untransfected (1), or transfected with MYC-PLIC-1 (2), MYC-PLIC-1<sup>UBA</sup> (3), MYC-PLIC-1<sup>UBL</sup> (4). PLIC-1 proteins were immunoprecipitated with anti-MYC (9E10) antibodies and probed by Western blot for (A) ubiquitinated proteins (Ub<sup>n</sup>) or (B) the MYC-tagged PLIC-1 proteins, arrow denotes the heavy chain of immunoglobulin (IgG). (C) Expression of the MYC-PLIC-1 constructs was also confirmed by Western blotting of lysates from transfected cells with an antibody to the MYC epitope. Polyubiquitinated (Ub<sup>n</sup>) protein binding is seen as a high molecular weight smear with full length PLIC-1 and PLIC-1<sup>UBL</sup> but not MYC-PLIC-1<sup>UBA</sup>.

**Supplementary Movie 1. Formation of EPS15 and PLIC-1 dependent structures.** HEK293 cells co-transfected with GFP-EPS15 and MYC-PLIC-1 were imaged by time-lapse microscopy for the GFP signal. Images taken every 90 seconds for 30 minutes are assembled sequentially in time.

**Supplementary Movie 2. Intact microtubules are required for the formation of EPS-15 and PLIC-1 structures.** HEK293 cells co-transfected with GFP-EPS15 and MYC-PLIC-1, treated with nocodazole (1 $\mu$ M) were imaged by time-lapse microscopy for the GFP signal. Images taken every 90 seconds for 30 minutes are assembled sequentially in time. Small ALIS are seen moving but not merging into larger ALIS.
