# Supplementary material
Source: PubMed Central journal article supplement (PMC1794689)

Supplementary Figure 1

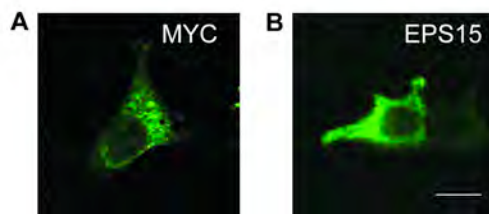

Supplementary Figure 2

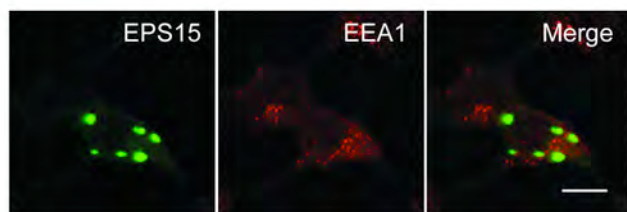

Supplementary Figure 3

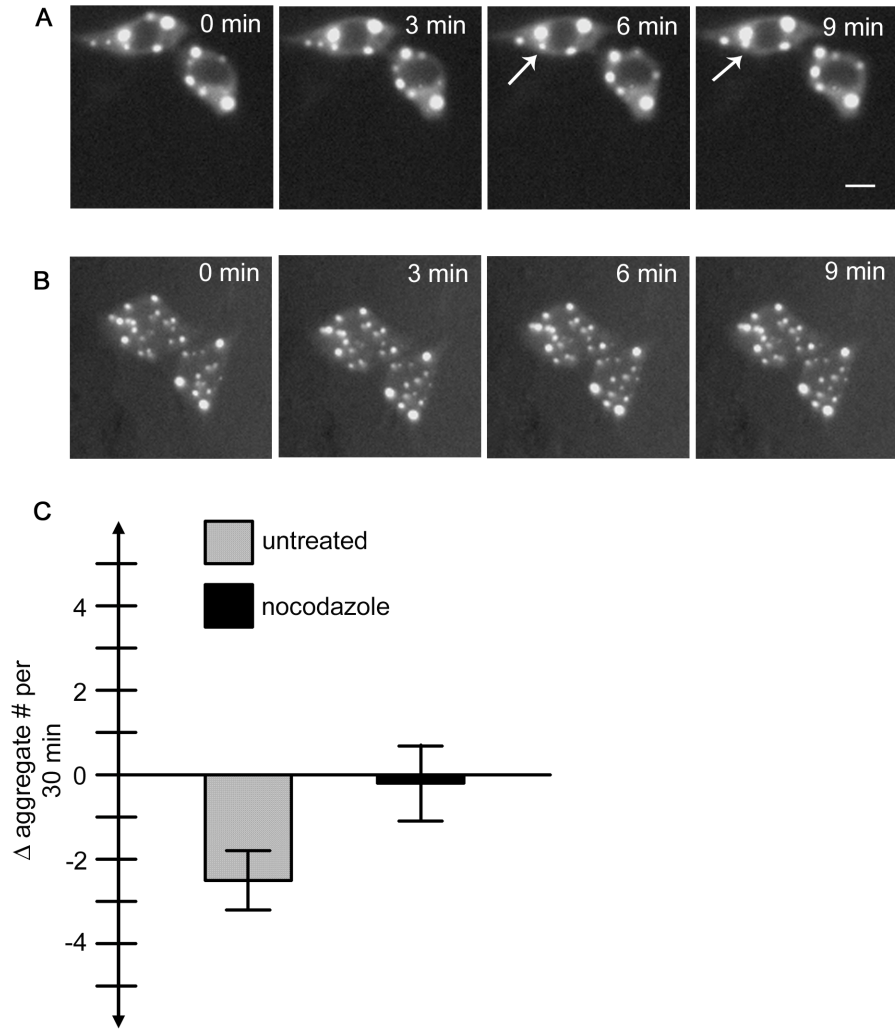

Supplementary Figure 4

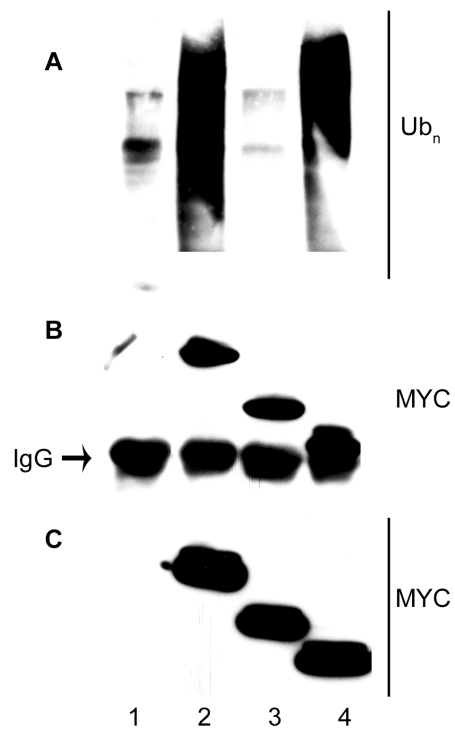

Supplement: 7400823-s2.pdf [file 7400823-s2.pdf]
